# Supplementary material for: Characteristics of layered occurrence ratio of polar mesosphere summer echoes observed by EISCAT VHF 224 MHz Radar
Source: Copernicus journal article supplement (doi:10.5194/angeo-2019-13), 2019-01-28
Supplement: Supplementary file [file angeo-2019-13-AC4-supplement.pdf]

# Characteristics of layered polar mesosphere summer echoes occurrence ratio ~~of polar mesosphere summer echoes~~ observed by EISCAT VHF 224MHz Radar

5 Shucan Ge<sup>1</sup>, Hailong Li<sup>1</sup>, Tong Xu<sup>2</sup>, Mengyan Zhu<sup>2</sup>, Maoyan Wang<sup>1</sup>, Lin Meng<sup>1</sup>, Safi Ullah<sup>1</sup>, Abdur Rauf<sup>1</sup>

<sup>1</sup>School of Electronic Science and Engineering, University of Electronic Science and Technology of China, 610054, Chengdu, China

10 <sup>2</sup>National Key Laboratory of Electromagnetic Environment, China Research Institute of Radiowave Propagation, 266107, Qingdao, China

*Correspondence to:* Hailong Li (hailong703@163.com)

**Abstract.** Polar Mesosphere Summer Echoes (PMSE) are strong radar echoes observed in polar mesopause during local summer. Observations~~Measurements~~ of layered PMSE ~~observed~~carried out by the European Incoherent Scatter Scientific Association Very high frequency (EISCAT VHF) radar ~~from 2004 to 2015~~during 2004-2015 in the latest solar cycle; ~~can be~~is used to study the variations of PMSE occurrence ratio (OR). Different seasonal behavior of PMSE is found by analyzing the seasonal variation of PMSE mono-, double- and tri-layer OR.~~The seasonal variation of PMSE mono-, double- and tri-layer occurrence ratio was analyzed, and there is different seasonal behavior.~~ A method was ~~given~~used to calculate the PMSE mono-, double- and tri-layer ~~occurrence ratio~~OR under different electron density threshold~~conditions~~. In addition, a method to analyze the correlation ~~between of layered~~ PMSE ~~layered occurrence ratios~~OR ~~and with~~ solar 10.7 cm flux index ( $F_{10.7}$ );~~and the correlation between PMSE layered occurrence ratios~~ and geomagnetic K index ~~were~~is proposed~~analyzed respectively in this study.~~ And base on it, the correlation of layered PMSE OR with solar and geomagnetic activities is not expected to affect by discontinuous PMSE. It ~~can be obtained~~is found that PMSE mono-, double- and tri-layer OR are positively correlated with the K index. The correlation ~~coefficient of between~~ PMSE mono- and double-layer OR ~~and with~~  $F_{10.7}$  is weak, ~~and whereas~~ the PMSE tri-layer OR ~~has~~shows a negative correlation with  $F_{10.7}$ .

**Keywords:** Polar Mesosphere Summer Echoes; ~~European Incoherent Scatter Scientific Association Very high frequency Radar~~EISCAT VHF radar; solar 10.7 cm flux index ( $F_{10.7}$ ) ; geomagnetic K index

---

## 1 Introduction

The ionosphere is an important part of near the ~~earth~~-Earth space environment and the mesosphere is the coldest region in the ~~earth's~~-Earth's atmosphere. Polar Mesosphere Summer Echoes (PMSE) are strong echoes detected by radars from medium frequency (MF) to ultra-high frequency (UHF) bands in polar summer mesopause, and PMSE has been considered to be possible indicators of global [climate](#) change (Thomas and Olivero, 2001). ~~On average, the strongest echo occurs at the altitude of about 86 km, and the~~The observation range is [from 75- to 100 km where on average, the strongest echo occurs at the altitude of about 86 km](#) (Czechowsky et al., 1979). Radar waves in the very high frequency (VHF) band are backscattered ~~by~~ [due to](#) irregularities of ~~the~~ electron density with spatial scales of about half the radar wavelength: ~~This was confirmed by Blix et al. (2003) from simultaneous rocket and radar observations, (Blix et al., 2003). These polar mesospheric summer echoes (PMSE) are fundamentally related to the ice particles in mesospheric ice clouds (Rapp and Lübken, 2004). Even though this theory has been presented incompletely, it still provides a great impetus for the research of PMSE generation mechanism. The most~~ [extensively accepted theory is that the irregularities of electron density is sustained due to the reduction in electron diffusion characterized by the slowest ambipolar diffusion mode associated with the charged ice grains \(Cho et al., 1992\).](#) ~~The most extensively accepted theory is that the electron diffusion was characterized by the slowest ambipolar diffusion mode associated with the charged ice grains (Cho et al., 1992).~~ Varney et al. (2011) scrutinized one particular aspect of the turbulent theory of PMSE: the electron density dependence of the echo strength. [One remarkable feature of all PMSE is the fact that the radar echoes often occur in the form of two or more distinct layers that can persist for periods of up to several hours. Until now, the layering mechanism leading to these multiple structures is only poorly understood in spite of some previous attempts involving gravity waves, the general thermal structure, and Kelvin-Helmholtz-instabilities \(Röttger, 1994; Klostermeyer, 1997; Hill et al., 1999, Hoffmann et al., 2005\).](#)

[Palmer et al. \(1996\) statistically analyzed the PMSE in northern hemisphere observed by the EISCAT VHF radar during 1988-1993.](#) ~~Palmer et al. (1996) presented a statistical study of PMSE, after analyzed the observations of the EISCAT VHF radar during 1988-1993.~~ They ~~suggested that~~ [confirmed that](#): (1) [PMSE are summer phenomena, lasting from June to August;](#) ~~these echoes are a summer phenomenon in the Northern hemisphere, lasting from June to August;~~ (2) PMSE occur mostly around noon and midnight, following a semidiurnal pattern; (3) the echoing structures move bodily, perhaps in response to gravity

waves. ~~based~~ Based on measurements ~~at 53.5 MHz in at~~ Andenes, Norway, ~~observed by the with the 53.5~~ 53.5 MHz ALOMAR SOUSY radar during 1994-1997 and ~~with the~~ ALWIN radar during 1999-2001. Bremer et al. (2003) ~~derived~~ found that the variation of PMSE is markedly controlled by solar cycle variations and precipitating high energetic particle fluxes. Bremer et al. (2006) discussed that the strength of PMSE depends on the level of ionization because of the long-term changes of mesospheric summer echoes caused by the incident solar wave radiation and precipitating high energetic particle fluxes from about 20 May to the end of August during 1998–2006. Smirnova et al. (2010) used the ESRAD MST radar's measurements; ~~Yi et al. (2017) and~~ found that the inter-annual variations of PMSE OR (occurrence ratio) and length of the season anticorrelated d with solar activity ~~represented by the~~ (F<sub>10.7</sub> index, the daily solar activity proxy ~~solar 10.7 cm radio flux)~~ but not significant, and correlate with geomagnetic activity ~~represented by (AP index) based on ESRAD MST radar measurements in Kiruna, Sweden.~~ ~~Nevertheless~~ However, no statistically significant trends in PMSE ~~yearly strengths~~ occurrence ratio or in the length of the PMSE season were found in their paperwork. Smirnova et al. (2011) concentrated on the accurate calculation of PMSE absolute strength as expressed by radar volume reflectivity and found that the inter-annual variations of PMSE volume reflectivity strongly correlate with the local geomagnetic K-index and anticorrelate with solar 10.7 cm flux. ~~but~~ However, they did not find any statistically significant trend in PMSE volume reflectivity during 1997-2009. Li and Rapp (2011) reported that ~~the correlations of the occurrence ratio of~~ PMSE OR at 224 MHz shows a positive correlation with ~~the both the~~ solar and geomagnetic activities ~~both show positive correlations~~. PMSE have been detected and widely studied based on long-term observations of many different MST radars (Reid et al., ~~2013~~ 1989; Thomas et al., 1992; Smirnova et al., 2011) ~~(Reid et al. 1989; Thomas et al. 1992; and Smirnova et al. 2011)~~; ~~since~~ Since from the first observation of PMSE in 1979, it is well-known that the PMSE observations ~~results~~ are different when ~~PMSE are~~ observed by different frequency radar even at the same sites, and PMSEs often show obvious layered events.

Many studies have widely reported that there is significant correlation between the ionization level and PMSE observed by 53.5 MHz radar (Inhester et al., 1990; Belova et al., 2007; Latteck et al., 2008). ~~Previous study by 53.5 MHz radar has provided the basic characteristics, the short term statistical variations of PMSE and the relation among the PMSE, solar activity and geomagnetic activity detected.~~ ~~The~~ The correlation of the ionization level with PMSE at 224 MHz ~~to the ionization level, however, is~~

as significant as that the correlation of the ionization level with PMSE at 53.5 MHz ~~to the ionization level~~, then previous studies ~~it~~ provides the research basis and ideas for the ~~research~~ PMSE study detected by 224MHz radar. There are still a few significant problems that must be solved with the characteristics of layered PMSE OR. Hence, it is necessary to analyze the layered PMSE ~~layered~~-OR and study layered PMSE ~~characteristics~~ deeply with data measured by 224 MHz EISCAT VHF radar under different observation conditions. The statistical results of layered PMSE ~~layered~~-OR with the same radar at the same site over the period 2004-2015 are given in this paper, which was based on the experiment data detected by 224 MHz EISCAT VHF radar. In addition, the correlation ~~relationships~~ of PMSE OR with, geomagnetic K index and  $F_{10.7}$  ~~are~~ is analyzed and discussed. The ~~PMSE-OR calculation~~ method of the correlation analysis between layered PMSE OR and solar activity and between layered PMSE OR and geomagnetic activity given in this paper without being affected by ~~solves~~ the defect of discontinuous PMSE measurements ~~that the measurements of EISCAT radar is discontinuous, which~~ It makes a significant breakthrough in the ~~calculation and~~ characterization of the layered PMSE ~~layered~~-OR ~~detected by EISCAT radar and~~ The aim of the current work is to provide the results could provide definitive data foundation for further analysis and the investigation of the physical mechanism of PMSE.

## 2 radar and experiment data description

The ~~experiment data of~~ PMSE observations used here were ~~was~~ obtained by ~~with~~ 224MHz EISCAT VHF radar from 2004 to 2015. EISCAT VHF ~~The~~ radar is located at Tromsø, Norway (69.35°N, 19.14°E), used and a parabolic cylindrical 120m ~~×~~ 46m ~~40m~~ antenna, ~~with beam widths of 1.8° north-south and 0.6° east-west~~. It is powerful tool for studying the lower ionosphere. Detailed descriptions of the radar can be found in Baron (1986). The measurements by EISCAT radar are very well suited for investigating the characteristics of PMSE. (for previous work, see e.g. Li et al., 2010 and references therein). It has frequency and phase modulation capability with pulse length of 1  $\mu$ s to 2 ms. ~~Furthermore, reliable information of the raw electron density about PMSE, which is not derived by analysis of the incoherent scatter spectrum, but power profiles or near zero lag data can be obtained by EISCAT radar. The level of electron density represents the intensity of echoes.~~ The parameters ~~described~~ are shown in Table 1 for accuracy control of EISCAT VHF radar.

EISCAT VHF radar ran several standard experiment modes: “manda, beata, bella, tau7, arcd (arc\_dlayer) and tau1”. The main differences between ~~the arcd and manda~~ [these experiment](#) modes are illustrated in Table 2. The manda and arcd modes mainly used for low altitude detection, and provide spectral measurements at mesospheric altitude. Therefore, the [accurate](#) data used in this study is mainly [given/provided](#) by manda and arcd modes. ~~The Grand Unified Incoherent Scatter Design and Analysis Program (GUISDAP) software package have been used for analyzing the EISCAT VHF radar data. The electron density  $N_e$  analyzed by GUISDAP software was obtained between  $10^6$  and  $10^{14} \text{ m}^{-3}$ .~~

. **Table 1** Parameters of the radars.

| Radar                              | EISCAT VHF                   |
|------------------------------------|------------------------------|
| Location                           | 69.59° N 19.23° E            |
| Operating frequency                | 224 MHz                      |
| Transmitter peak power             | 1.5 MW                       |
| Antenna 3-dB beam width            | 1.7° NS <del>×</del> 1.2° EW |
| Antenna effective area             | 5690 m <sup>2</sup>          |
| Pulse length (altitude resolution) | 300 m                        |
| Pulse repetition frequency         | 741 Hz                       |
| No. of bits in code                | 64                           |
| No. of code permutations           | 128                          |
| No. of coherent integrations       | 1                            |
| Lag resolution                     | 1.35 ms                      |
| Maximum lag                        | 0.17 s                       |

**Table 2** EISCAT VHF radar standard experiments.

| Name       | Code length [bit] | Baud length [μs] | Sampling rate [μs] | Range span [km] | Time resolution [s] | Plasma line | Raw data |
|------------|-------------------|------------------|--------------------|-----------------|---------------------|-------------|----------|
| manda      | 61                | 2.4              | 1.2                | 19–209          | 4.8                 | -           | Yes      |
| arc_dlayer | 64                | 2                | 2                  | 60–139          | 5.0                 | -           | -        |
| beata      | 32                | 20               | 20                 | 52–663          | 5.0                 | Yes         | -        |
| bella      | 30                | 45               | 45                 | 63–1344         | 3.6                 | Yes         | -        |
| tau7       | 16                | 96               | 12                 | 50–2001         | 5.0                 | -           | -        |
| tau1       | 16                | 72               | 24                 | 104–2061        | 5.0                 | -           | -        |

### 3 Data analysis

In this study we have used the EISCAT VHF radar data from 2004 to 2015. The software package GUIDAP (Grand Unified Incoherent Scatter Design and Analysis Program) (see Lehtinen and Huuskonen, 1996 and [www.eiscat.se](http://www.eiscat.se) for details) was used for analyzing radar data. The electron density  $N_e$  analyzed by GUIDAP software was obtained between  $10^6$  and  $10^{14} \text{ m}^{-3}$ . The level of electron density represents the intensity of echoes.

First of all, the heating parts were removed from the data set to avoid the heating effect. After that, the presence of PMSE was defined as the threshold of electron density ( $N_e > 2.6 \times 10^{11} \text{ m}^{-3}$ ). We used the PMSE threshold given by Hocking and Röttger (1997) and Qiang Li (2011b) (see Appendix A Table A.2). Besides, some abnormal echoes are related to the meteor are not considered to be PMSE and is neglected in later discussion. PMSE is not continuous in time, so if the electron density satisfies the threshold ( $N_e > 2.6 \times 10^{11} \text{ m}^{-3}$ ), we considered it as a PMSE event. We have considered only those events for which PMSE echoes are continuous for time ( $t \geq 1 \text{ min}$ ).

### 4 Results

#### 34.1 Layered PMSE Occurrence-ratios events

PMSE occur in thin layers having thickness up to 3-4 km, and the mean altitude distribution of PMSE events is 80-90km. It is considered to be the area of independent ~~abnormal~~-anomalous echoes. Fig. 1 (a), (b) and (c) show the typical events of PMSE monolayer, double-layer and tri-layer, respectively. As mentioned in the introduction, a notable feature of PMSE observed by radar is that radar echoes typically occur in the form of two or more layers. However, the system theories of the layering mechanism led to these multiple structures didn't come into being. ~~One remarkable feature of all PMSE is the fact that the radar echoes often occur in the form of two or more distinct layers that can persist for periods of up to several hours. Until now, the layering mechanism leading to these multiple structures is not well understood.~~ Here we ~~are~~-will studying the occurrence of these layered PMSE~~multiple-layer~~ events and

its relationship with solar and geomagnetic activity. This content will be discussed in detail later in the [article](#)[paper](#).

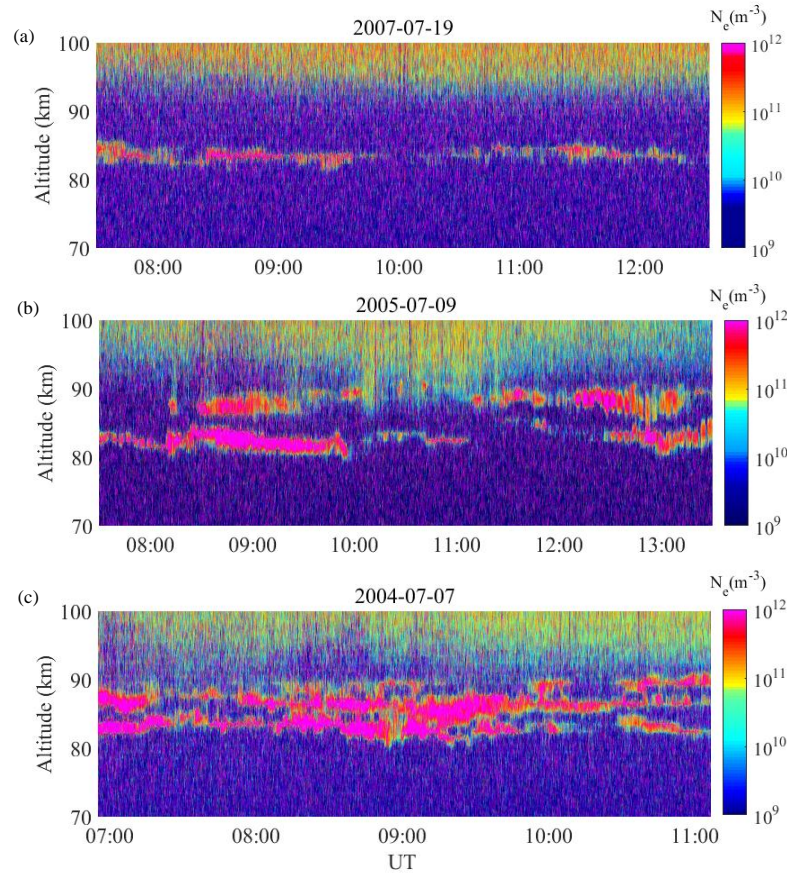

5 **Fig. 1** The typical layered PMSE events observed by EISCAT 224MHz VHF radar. a) ~~The observation on 19 July, 2007 (Upper panel)~~[Monolayer PMSE](#); b) ~~The observation on 9 July, 2005 (Middle panel)~~[Double layer PMSE](#); c) ~~The observation on 7 July, 2004 (lower panel)~~[Tri-layer PMSE](#). ~~The red circle marks the obvious layered phenomenon of PMSE events.~~

#### 10 [34.1.2 Layered PMSE OR](#) ~~Calculation~~[calculation](#) method

[The calculation method is based on individual horizontal profiles. When the electron density satisfies the PMSE threshold \( \$N\_e \geq 2.6 \times 10^{11} \text{ m}^{-3}\$ \), then that time was taken as the starting time of the PMSE occurrence and until the time when the electron density fails to satisfy the threshold was taken as the end time of PMSE occurrence. The time of PMSE duration is the time difference between the end and the starting time of the PMSE occurrence. The time interval not be regarded as PMSE occurrence time, if the time interval between them is shorter than 1 minute \( \$t < 1 \text{ min}\$ \). Taking the calculation method of](#)



monolayer PMSE OR as an example: We defined that the ratio between the sustained time of monolayer PMSE and the total observation time as the monolayer PMSE OR. The applied procedure for the detection of multiple PMSE layers is based on individual vertical profiles with a high temporal resolution (Hoffmann, 2004). The layer ranges are identified by an electron density threshold of  $2.6 \times 10^{11} \text{m}^{-3}$  ( $N_e > 2.6 \times 10^{11} \text{m}^{-3}$ ). Once a vertical profile of the electron density has two peaks and these two peaks are higher than the threshold ( $N_e > 2.6 \times 10^{11} \text{m}^{-3}$ ), we select it as a double layer. The PMSE double-layer OR is the ratio between the sustained time of PMSE double layer and the total observation time. The tri-layer OR is also calculated by using the same way.

~~To find the characteristic of PMSE occurrence ratio (OR), a computing method and threshold must be defined. First of all, the data during radar heating experiments has been eliminated. After that, the number of data points satisfying the threshold of electron density ( $N_e > 2.6 \times 10^{11} \text{m}^{-3}$ ) was calculated (Hoeking and Röttger, 1997). PMSE is not continuous in time, so if the number of data points satisfying the electron density threshold of PMSE were less than 8 data points in any time interval, these data points were replaced with the average of electron density ( $N_e$ ) of 80-90 km regardless of the threshold (Rauf et al., 2018). It maintained the original electron density values at the corresponding time, so that the correlation is not influenced. The correlation coefficients have been calculated between PMSE OR and the 10.7cm of the solar flux index (F10.7), PMSE OR and geomagnetic events K indices, respectively. Because we chose the integration time of manda and ared models are 4.8s and 2s respectively, on the basis of the condition ( $t \geq 1 \text{ min}$ ), the PMSE is needed to be simultaneous for  $\geq 12$  and 30 data points, respectively. What's more, some abnormal echoes are related to the precipitation particle areas are not considered to be PMSE and is neglected in later discussion.~~

~~The emphasis of this paper is to present a hybrid algorithm based on grid partitioning. The calculation method is based on time. Taking the calculation method of PMSE monolayer occurrence ratio as an example, the all electron density detected by the EISCAT VHF radar are counted, and the electron density with the value larger than the threshold in this time period are taken out. The ratio between the sustained time of monolayer PMSE and the total observation time is obtained. At different heights, when an electron density value greater than the threshold and less than the threshold is continuously alternate observed in an observation region with altitude range from 3-4km, we consider that double layer or multi-~~



layer PMSE events occur. The PMSE double layer OR is the ratio between the sustained time of PMSE double layer and the total observation time. The tri-layer OR is also calculated in this way.

### 3.4.2.3 The variations of layered PMSE occurrence ratios

For studying the layered PMSE OR, layered PMSE occurrence time (OT) and total observing time detected by EISCAT VHF radar from 2004 to 2015 were illustrated in Table 3. PMSE mono-, double-, tri-layer and total OR were also presented in Table 3 as well.

**Table 3** Statistical data from 2004 to 2015.

| Year | Total Observing Time (min) | Monolayer PMSE OT (min) | Double Layer PMSE OT (min) | Tri-layer PMSE OT (min) | Monolayer OR [%] | Double layer OR [%] | Triple-Tri-layer OR [%] | Total OR [%] |
|------|----------------------------|-------------------------|----------------------------|-------------------------|------------------|---------------------|-------------------------|--------------|
| 2004 | 16054                      | 4701                    | 2774                       | 151                     | 29.28%           | 17.28%              | 0.94%                   | 47.50%       |
| 2005 | 8165                       | 3564                    | 1491                       | 182                     | 43.65%           | 18.26%              | 2.23%                   | 64.14%       |
| 2006 | 9248                       | 2950                    | 910                        | 93                      | 31.78%           | 9.84%               | 1.01%                   | 42.63%       |
| 2007 | 9341                       | 3027                    | 804                        | 0                       | 32.41%           | 8.61%               | 0.00%                   | 41.02%       |
| 2008 | 3310                       | 763                     | 97                         | 0                       | 23.06%           | 2.92%               | 0.00%                   | 25.98%       |
| 2009 | 2264                       | 424                     | 76                         | 8                       | 18.72%           | 3.34%               | 0.35%                   | 22.41%       |
| 2010 | 6303                       | 1799                    | 498                        | 53                      | 28.54%           | 7.90%               | 0.84%                   | 37.28%       |
| 2011 | 9638                       | 3624                    | 2692                       | 202                     | 37.60%           | 27.93%              | 2.10%                   | 67.63%       |
| 2012 | 7497                       | 3550                    | 1554                       | 207                     | 47.35%           | 20.73%              | 2.76%                   | 70.84%       |
| 2013 | 14037                      | 6906                    | 3873                       | 532                     | 49.20%           | 27.59%              | 3.79%                   | 80.59%       |
| 2014 | 2971                       | 998                     | 731                        | 64                      | 33.60%           | 24.6%               | 2.15%                   | 60.35%       |
| 2015 | 4776                       | 2019                    | 1022                       | 22                      | 42.28%           | 21.40%              | 0.46%                   | 64.14%       |

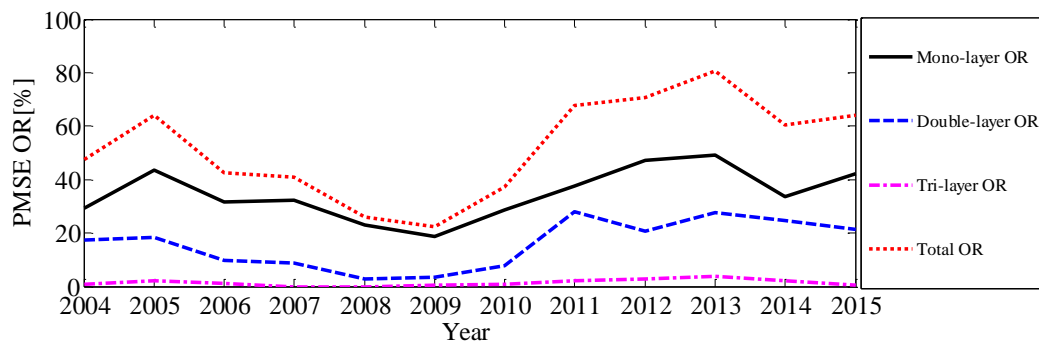

**Fig. 2** Layered PMSE occurrence ratio. The OR of total (red dot line). The OR of monolayer (black solid line). The OR of double-layer (blue dashed line). The OR of triple-layer (pink dot-dashed line).

Fig. 2 shows that the mono- double- and triple-layer OR agrees with the total PMSE OR. We calculated the correlation of mono-layer with double-layer OR, tri-layer OR and total OR using the Spearman rank correlation coefficients (It will be particular described in section 4.3.2). ~~between mono-layer OR and double layer OR, mono layer OR and tri layer OR, mono layer OR and Total OR, respectively.~~ The correlation coefficients ( $r_s$ ) of mono-layer with double-layer OR, tri-layer OR and total OR are 0.7922, 0.7718 and 1, respectively. All the correlation coefficients are statistically significant with ~~reached very significant level~~ ( $P < 0.05$ ), respectively. These high values of correlation coefficients show that the correlation of mono-layer with double-layer OR, tri-layer OR, and total OR is very high. In addition, the layered PMSE ~~layered~~ OR from 2008 to 2010 is relatively low, and the solar activity ~~was is~~ relative 'quiet' in these years.

Fig. 2 shows ~~Two two~~ significant phenomena ~~can be discovered from Fig. 2: One was (1) the~~ The variation trends of layered mono-, double- and tri-layer PMSE OR of PMSE ~~is is~~ rules to follow ~~different but regular. That is i.e.,~~ the OR of monolayer is the highest, double-layer lies in the middle and the triple-layer is the lowest; ~~The other (2) was~~ The layered PMSE ~~layered~~ and total OR values show similar shape of sinusoidal, which has obvious wave peak and wave valley. One wave peak lies in ~~the year about~~ 2005 and; the other lies in ~~the year~~ 2013. The values of two wave peaks are different; and the values in 2005 are smaller than that in 2013. The values of wave valley lie in 2008-2009. ~~Meanwhile, the gap between two peaks of PMSE OR is about 7 or 8 years.~~ Here we only give the results of the data analysis, no longer do the cause analysis, because the stratification of PMSE is affected by many factors and has yet to be decided. The analyzing method and ~~the results drawn during the process of~~ given in this paper have a significant ~~certain~~ reference value for ~~right and in depth researching studying~~ the PMSE ~~phenomenon~~.

#### 3.4.3.4 Seasonal behaviour

The mean seasonal variations of the layered PMSE ~~layered~~ OR and PMSE total OR observed by EISCAT VHF radar during 2004-2015 ~~were is~~ shown in Fig. 3 and Fig. 4, respectively. Fig. 3 illustrates the mean seasonal variation of the mono- (blue bars) double- (yellow bars) and tri-layer (red bars) PMSE OR and ~~quartic second order~~ polynomial fitting for the monolayer PMSE OR (black dot-curve) during 2004-2015. Fig. 4 shows the mean seasonal variation of PMSE total OR (blue bars) and ~~3/π harmonic fitting second order polynomial fit~~ for total PMSE OR (black dot-curve) during 2004-2015. It ~~can be is~~ derived ~~clear~~

from Fig. 3 and Fig. 4 that the monolayer PMSE events in the Tromsø, Norway, often begins in late May, reaches its maximum in early June or mid-June, keeps this level until the end of July or beginning of August, and gradually decreases or vanishes when it is close to the end of August or the beginning of September in general, which ~~was~~ is in agreement with ~~references~~ (Smirnova et al., (2011)). The double-layer PMSE also begins in late May, but its maximum appears in mid-July. In addition, it keeps the larger value in June and July, and simply fade away in early August. The ~~triple~~-layer PMSE appears a lot less in comparison to mono- ~~and~~, double- layer PMSE. In terms of time, it appears later and disappears earlier. ~~What's- Further~~more, the ~~triple-tri~~- layer PMSE OR is large in end of June and early July, which is different than monolayer and double layer PMSE OR.

According to the statistical results, ~~PMSE~~-monolayer, double-layer and ~~multilayer-tri-layer PMSE~~ OR have seasonal variation. Moreover, there is fluctuation in the trends of  $F_{10.7}$  and geomagnetic K-indices. ~~In addition, the trends of  $F_{10.7}$  and geomagnetic K-index also fluctuates.~~ Therefore, it is necessary to investigate the correlation of solar and geomagnetic activity ~~on-with~~ different layered PMSE OR during 2004-2015, and ~~better~~-try to explain the occurrence mechanism of PMSE. It is well known that other missions apart from PMSE regular observations are performed by EISCAT VHF radar, so EISCAT radar does not provide continuous PMSE observations. ~~Just by noting that there have a few deviations by methods of calculating layered PMSE OR, we~~ We raise an important question: Table 3 indicates a difference in total observation time for the individual years. How has this been taken into account for the determination of occurrence ratios? To solve this problem ~~Therefore~~, we use another method to recalculate the layered PMSE ~~layered~~-OR. Then the correlation between the layered PMSE ~~layered~~-OR and the  $F_{10.7}$  and between the layered PMSE ~~layered~~-OR and K index ~~were-are~~ studied. As mentioned in the calculation method section, we only select the days ~~when-where~~ PMSE ~~is-existed~~ present and calculate the layered ~~occurrence-ratio~~ OR of PMSE.

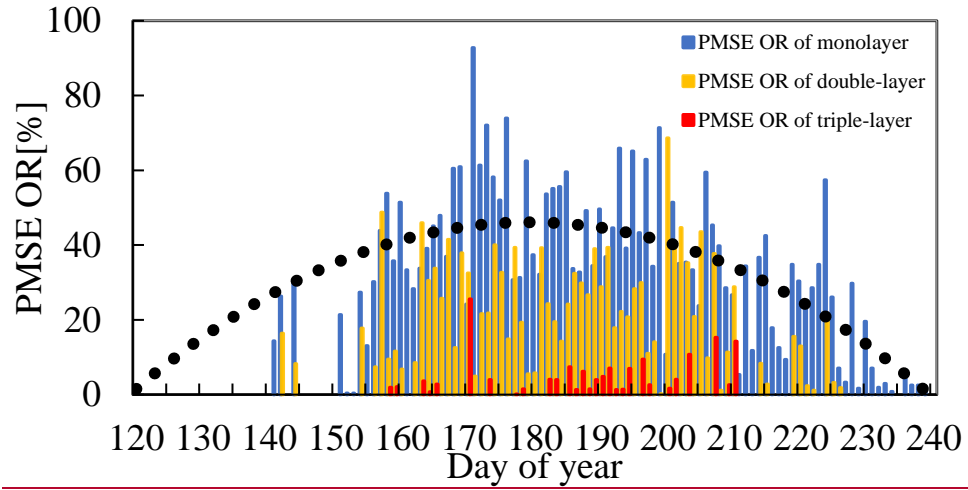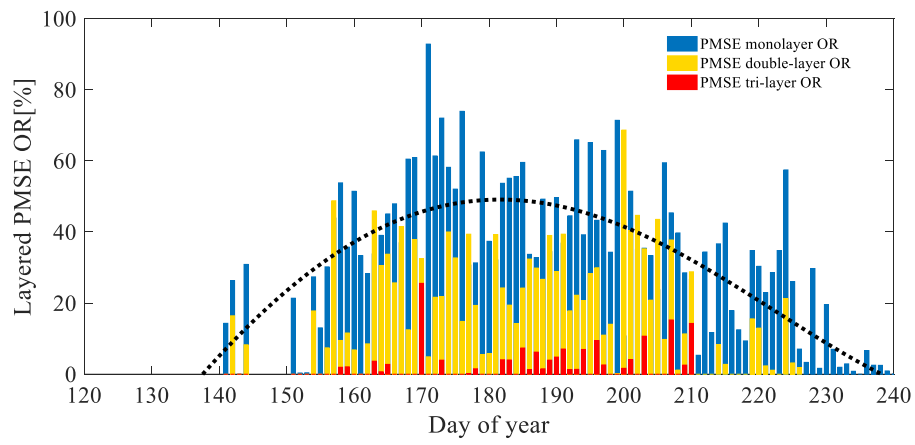

Fig. 3 Mean seasonal variation of the PMSE mono-(in blue), double-(in yellow), triple-layer (in red) PMSE occurrence ratio at Tromsø using observations from 2004 to 2015.

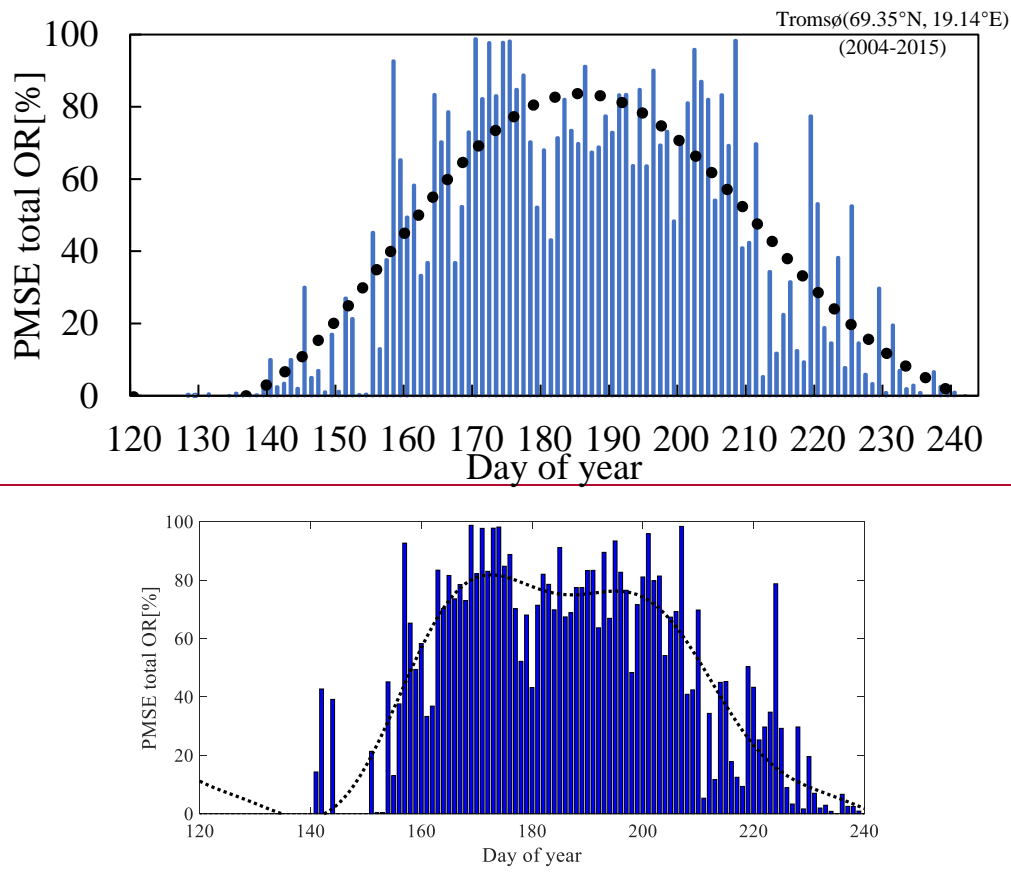

Fig. 4 Mean seasonal variation of ~~the PMSE total~~ PMSE occurrence ratio.

#### 4.5 Discussion

5 ~~We have calculated the~~ The layered PMSE ~~layered~~ OR was calculated and the relations among PMSE mono-, double- and triple- layer OR ~~were~~ was analyzed statistically. At the same time, the mean seasonal variations of the layered PMSE OR and PMSE total OR have been presented ~~were given~~. Hoffmann (2004) shows that the layering occurs because of subsequent nucleation cycles of ice particles in the uppermost (and coldest) gravity wave induced temperature minimum (see Hoffmann, 2004, Figure 3a).  
 10 Subsequently, these newly created ice particles grow and sediment down and lead to the distinct layering. Besides, ~~It is now generally accepted that both~~ Rapp and Lübken (2004) found that charged ice particles and atmospheric turbulence play major roles in the change of the electron number density that ~~leads to~~ PMSE in the mesopause region (~~Rapp and Lübken, 2004~~). We know that solar and geomagnetic activities have a certain degree of influence on the occurrence of PMSE, ~~but~~ however, the effects of solar and  
 15 geomagnetic activities on layered PMSE are not ~~clear~~ understood well. Therefore, it is necessary to study

the effects of solar and geomagnetic activities on layered PMSE. The occurrence ratio obtained by the ratio of the occurrence time of PMSE to the total observation time is the calculation method in the traditional sense. It is easy to understand and accurately analyze the short-term variations, such as diurnal variation and seasonal variation of PMSE. However, the long-term trend is subject to error and dispute~~inaccurate~~ by using this calculation method,~~because the radar measurement data is not continuous.~~ And Furthermore, it is difficult to discuss and analyze the correlation of layered PMSE OR with solar~~relations between PMSE and solar activities and between PMSE~~ and geomagnetic activities. Therefore, we have ~~designed~~presented a new calculation method for calculating the layered PMSE ~~layered~~-occurrence ratio, which is ~~based on the height~~different from the method given in section 4.2. So that, the layered ~~occurrence of~~ PMSE ~~becomes continuous, and the long term variations of PMSE OR~~ is becomes ~~\_easy and~~ relatively accurate. The correlation of PMSE with solar and geomagnetic activities is not expected to affect by discontinuous PMSE. The study of relations between PMSE and solar activities and between PMSE and geomagnetic activities ~~can be studied~~are significant.

#### 4.5.1 Another method for layered PMSE OR ~~Calculation~~ Calculation method

~~The calculation method is based on altitude. A large number of literatures and experimental observations have shown that the altitude range of PMSE is 80-90km (Li and Rapp, 2011; Smirnova et al., 2010; Latteck and Bremer, 2013). Among all the altitude and electron density observed by EISCAT VHF radar, we only take the apparent electron density in the altitude range of 80-90km, and then take out the electron density greater than the threshold in the period when the PMSE is known to be present. The ratio between the numbers of layered PMSE electron densities values greater than the threshold and the numbers of total electron density in the range of 80-90 km was calculated respectively. The double-layer and tri-layer PMSE OR obtained by this method have a higher occurrence ratio than the first method.~~

The emphasis of this section is to present a hybrid algorithm based on grid partitioning. The calculation method is based on altitude. A large number of literatures and experimental observations have shown that the altitude range of PMSE is 80-90km (Li and Rapp, 2011; Smirnova et al., 2010; Latteck and Bremer, 2013). Hoffmann (2004) shows a mean height of 84.8 km for monolayer PMSE, whereas in the case of multiple layers PMSE, the lower layer occurs at a mean height of ~83.4 km. For the second layer

in the case of multiple PMSE layer structures shows a maximum at about 86.3 km (The judging criteria in regard to the multiple layer PMSE see section 4.3). Firstly, we counted the total number of electron density at altitude of 80-90km and then counted the number of electron density satisfying the PMSE threshold ( $N_e > 2.6 \times 10^{11} \text{m}^{-3}$ ) in the period when the PMSE is known to be present (if electron density satisfies the threshold  $N_e > 2.6 \times 10^{11} \text{m}^{-3}$ , we identify layered PMSE exist at this moment). The ratio between the numbers of layered PMSE electron densities values larger than threshold and the numbers of total electron density at altitude of 80-90 km was calculated. The double-layer and tri-layer PMSE OR calculated by this method is higher than the layered PMSE OR calculated by the method given in section 4.2. The correlation coefficients were calculated between PMSE OR and the 10.7cm of the solar flux index ( $F_{10.7}$ ) and between PMSE OR and geomagnetic K index, respectively. The PMSE have been identified only for the time of PMSE duration lager than 1 min ( $t \geq 1 \text{ min}$ ). Because the integration time of manda and arcd models are 4.8s and 2s respectively, on the basis of the condition ( $t \geq 1 \text{ min}$ ), the PMSE is needed to be for  $\geq 12$  and 30 data points, respectively.

#### 4.5.2 Layered PMSE OR under different electron density threshold

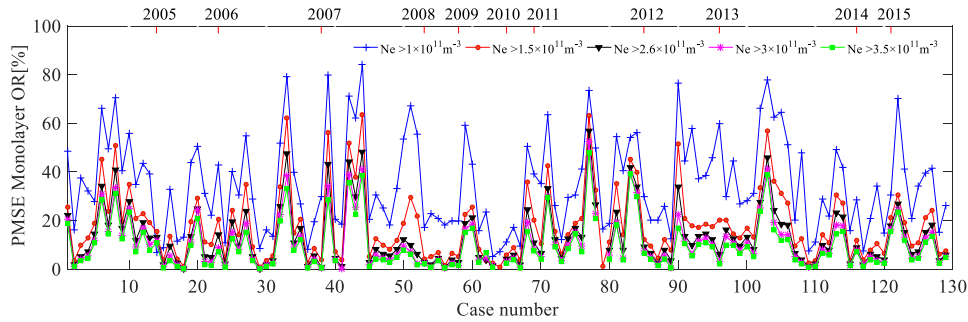

**Fig. 5 PMSE monolayer occurrence ratio under different electron density threshold conditions with axis at top showing the time in years. Vertical lines are the end of 2006 and 2011, respectively (black dashed line). The legends on the figure is the average of PMSE occurrence rate in three time periods separated by the black dashed line.**



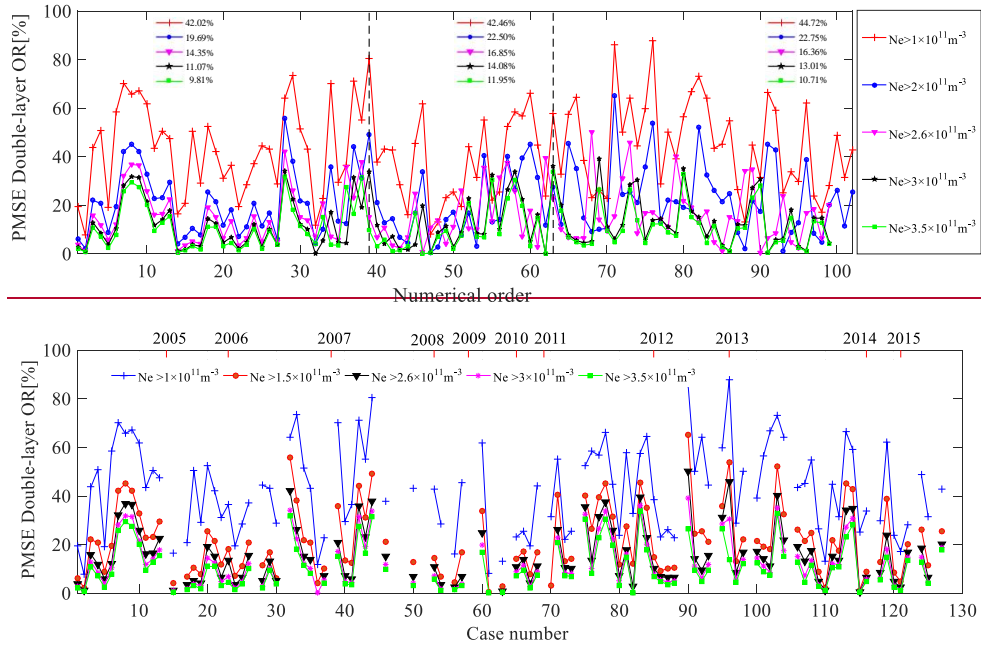

**Fig. 6 PMSE double-layer occurrence ratio under different electron density threshold conditions with axis at top showing the time in years. Vertical lines are the end of 2006 and 2011 (black dashed line). The legends on the figure is the average of PMSE occurrence rate in three time periods separated by the black dashed line.**

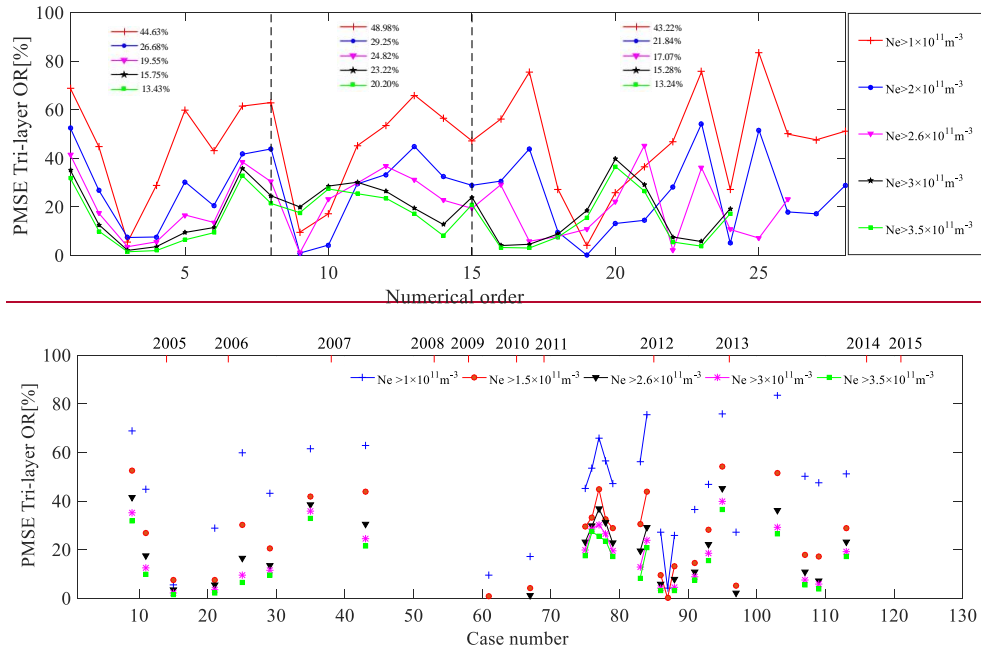

**Fig.7 PMSE tri-layer occurrence ratio under different electron density threshold conditions with axis at top showing the time in years. Vertical lines are the end of 2006 and 2011 (black dashed line). The legends on the figure is the average of PMSE occurrence rate in three time periods separated by the black dashed line.**

In this section, the day when the first occurrence of PMSE in 2004 (regardless of duration) was recorded as 1, and the day with the later occurrence of PMSE increased by sequence. Using this sequence as the horizontal axis and the layered PMSE OR with different electron density threshold as the vertical axis, the results are shown in Fig. 5, 6, and 7. That is, Fig. 5, Fig. 6 and Fig. 7 show PMSE mono- double- and tri-layer OR under different electron density threshold conditions, respectively. In the calculation method section we said that we have defined the electron density threshold ( $N_e \geq 2.6 \times 10^{11} \text{ m}^{-3}$ ). Here, we give the layered PMSE OR with threshold conditions of  $N_e \geq 1 \times 10^{11} \text{ m}^{-3}$ ,  $N_e \geq 1.5 \times 10^{11} \text{ m}^{-3}$ ,  $N_e \geq 2.6 \times 10^{11} \text{ m}^{-3}$ ,  $N_e \geq 3 \times 10^{11} \text{ m}^{-3}$  and  $N_e \geq 3.5 \times 10^{11} \text{ m}^{-3}$ , respectively. We can get their found the variation trends of layered PMSE OR with different threshold to be are largely consistent. In addition, the larger the threshold, the smaller the ratio. Smirnova et al. (2010) analyzed day-to-day and year-to-year variations of PMSE OR for different thresholds. They found that the choice of the threshold does not influence the shape of the variation curves for PMSE OR. Zeller and Bremer (2009) indicated that different threshold values are for the investigations of the influence of geomagnetic activity on PMSE, however, of less importance. They both think that the variation trends of PMSE OR with different threshold are consistent. The aim of choosing 5 different thresholds is also to increase the number of samples for calculating the correlation coefficients between layered PMSE OR and F10.7 and between layered PMSE OR and K index. Since these occurrence ratios are calculated in the case where the occurrence of PMSE is determined, there is no case of missing data so, and it can be recognized that these occurrence rates are reliable. The legends on the figure is the average of PMSE mono-, double- and triple-layer OR with threshold conditions of  $N_e \geq 1 \times 10^{11} \text{ m}^{-3}$ ,  $N_e \geq 1.5 \times 10^{11} \text{ m}^{-3}$ ,  $N_e \geq 2.6 \times 10^{11} \text{ m}^{-3}$ ,  $N_e \geq 3 \times 10^{11} \text{ m}^{-3}$  and  $N_e \geq 3.5 \times 10^{11} \text{ m}^{-3}$  during the periods of 2004-2006, 2007-2011 and 2012-2015. It is well known that the period of 2006-2009 is solar minimum and 2012 is solar maximum, but the PMSE mono- and double-layer average OR in 2007 is not consistent with solar activity. In other words, there has is no obvious correlation between PMSE-mono- and double-layer PMSE OR and solar activity. What's more, we found that PMSE triple-layer OR and solar activity in opposite directions. To prove the conclusion, we will calculate the correlation coefficient between layered PMSE OR and solar activity and between layered PMSE OR and geomagnetic activity in next section. Therefore, the correlation relation between them can be judged directly.

---

## 4.5.3 Effect of solar and geomagnetic activity on PMSE OR

### 4.5.3.1 F<sub>10.7</sub> index and K<sub>p</sub>-index

The F<sub>10.7</sub> index is a measure of the solar radio flux per unit frequency at a wavelength of 10.7 cm, near the peak of the observed solar radio emission. F<sub>10.7</sub> is often expressed in SFU or solar flux units (1 SFU = 10<sup>-22</sup> W·m<sup>-2</sup>·Hz<sup>-1</sup>). It represents a measure of diffuse, nonradiative coronal plasma heating. It is an excellent indicator of overall solar activity levels and correlates well with solar UV emissions. The K-index quantifies disturbances in the horizontal component of ~~earth's~~ Earth's magnetic field with an integer in the range 0-9 with 1 being calm and 5 or more indicating a geomagnetic storm. It is derived from the maximum fluctuations of horizontal components observed on a magnetometer during a three-hour interval. The K-index was introduced by Julius Bartels in ~~1938~~ 1939 (Bartels et al., 1939). The K index values used in the paper is the median of the K index observed on a magnetometer during a day, ~~which~~ where ~~has removed~~ the effects of the heating experiments were removed.

### 4.5.3.2 Correlation coefficients

A correlation coefficient is a numerical measure of some type of correlation, meaning a statistical relationship between two variables (Boddy and Smith, 2009). The Pearson correlation coefficient known as Pearson's  $r$ , is a measure of the strength and direction of the linear relationship between two variables that is defined as the covariance of the variables divided by the product of their standard deviations. ~~This is the best known and most commonly used type of correlation coefficient.~~ Pearson's correlation coefficient Given a pair of random variables (X, Y), the formula for  $r$  is (Wilks, 1995):

$$r_{X,Y} = \frac{\text{cov}(X,Y)}{\sigma_X \sigma_Y}$$

Where:

$\text{Cov}$  is the covariance.

$\sigma_X$  is the standard deviation of  $X$

$\sigma_Y$  is the standard deviation of  $Y$ .

Spearman's rank correlation coefficient is a measure of how well the relationship between two variables can be described by a monotonic function. The Spearman correlation between two variables is equal to the Pearson correlation between the rank values of those two variables. While Pearson's correlation assesses linear relationships, Spearman's correlation assesses monotonic relationships (whether linear or

---

not) (Well and Myers, 2003). For a sample of size  $n$ , the  $n$  raw scores  $X_i, Y_i$  are converted to ranks  $rgX_i, rgY_i$ , and  $r_s$  is computed from:

$$r_s = \frac{\text{cov}(rg_X, rg_Y)}{\sigma_{rg_X} \sigma_{rg_Y}}$$

Where:

5  $\text{cov}(rg_X, rg_Y)$  is the covariance of the rank variables.

$\sigma_{rg_X}$  and  $\sigma_{rg_Y}$  are the standard deviations of the rank variables.

A high value (approaching +1.00) is a strong direct relationship, values near 0.50 are considered moderate and values below 0.30 are considered to show weak relationship. A low negative value (approaching -1.00) is similarly a strong inverse relationship, and values near 0.00 indicate little, if any relationship.

10 To determine whether a result is statistically significant, a  $P$ -value is calculated, which is the probability of observing an effect of the same magnitude or more extreme given that the null hypothesis is true (Devore, 2011). The null hypothesis is rejected if the  $P$ -value is less than a predetermined level (usually  $\alpha=0.05$ ). Where  $\alpha$  is called the significance level, and is the probability of rejecting the null hypothesis given that it is true (a type I error).

15

### 4.5.3.3 Correlation between layered PMSE OR, $F_{10.7}$ and K index

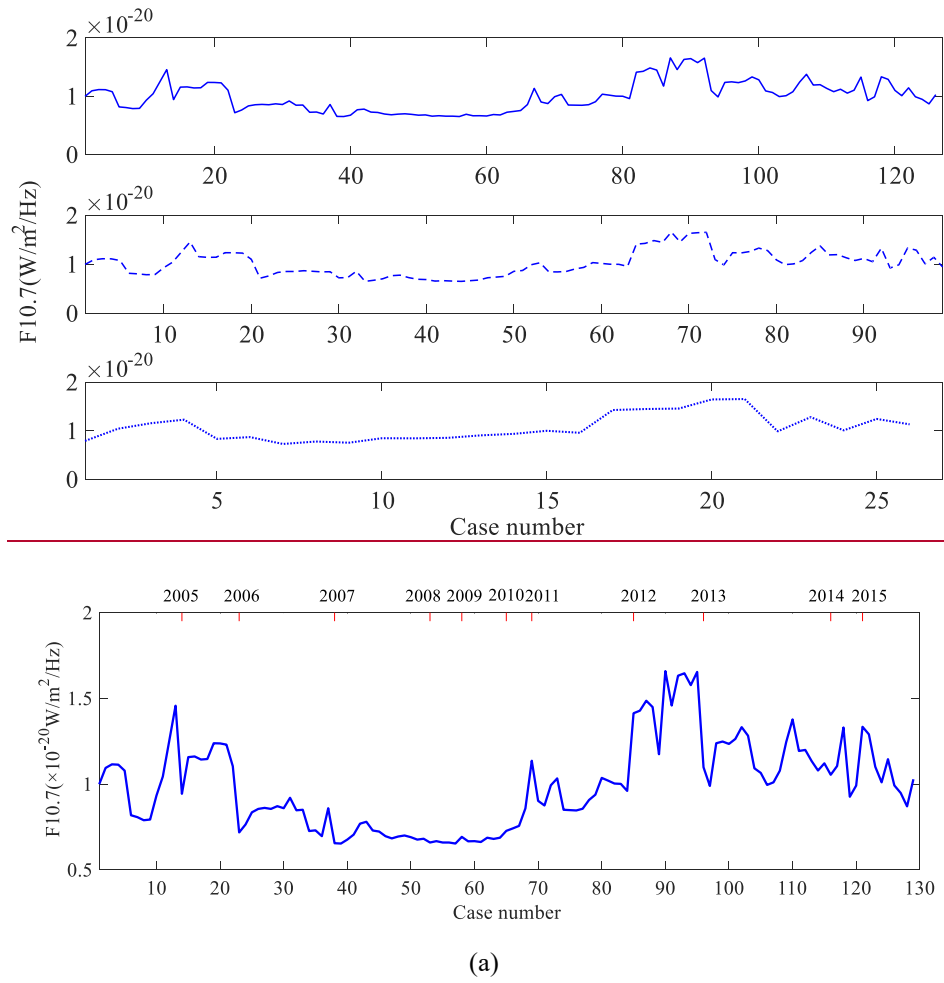

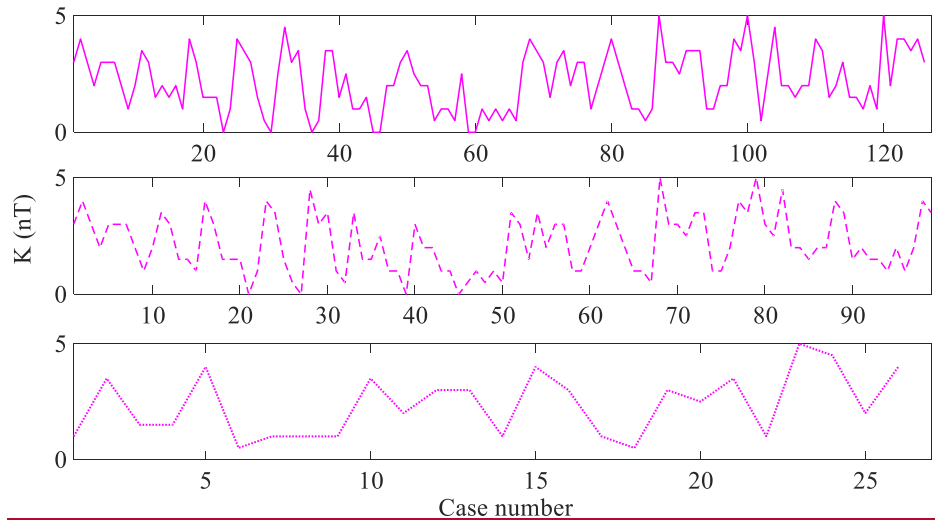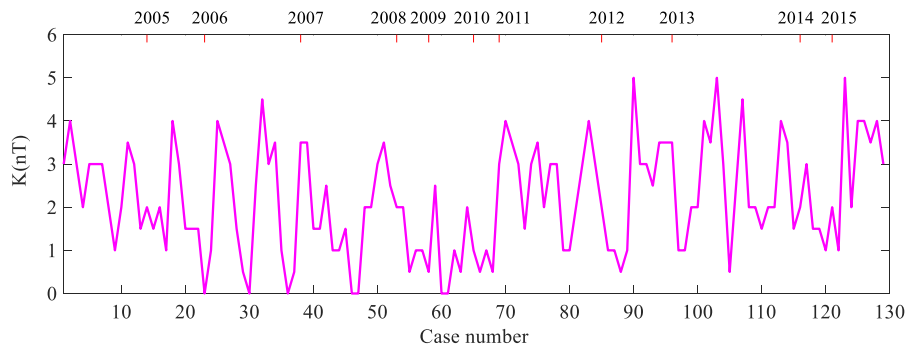

(b)

**Fig. 8 (a) The variations of  $F_{10.7}$  values corresponding to the occurrence of PMSE with axis at top showing the time in years. Upper panel:  $F_{10.7}$  values corresponding to the occurrence of mono-layer PMSE; Middle panel:  $F_{10.7}$  values corresponding to the occurrence of double-layer PMSE; lower panel:  $F_{10.7}$  values corresponding to the occurrence of triple-layer PMSE. (b) The variations of geomagnetic K index values corresponding to the occurrence of PMSE with axis at top showing the time in years. Upper panel: K index values corresponding to the occurrence of mono-layer PMSE; Middle panel: K index values corresponding to the occurrence of double-layer PMSE; lower panel: K index values corresponding to the occurrence of triple-layer PMSE.**

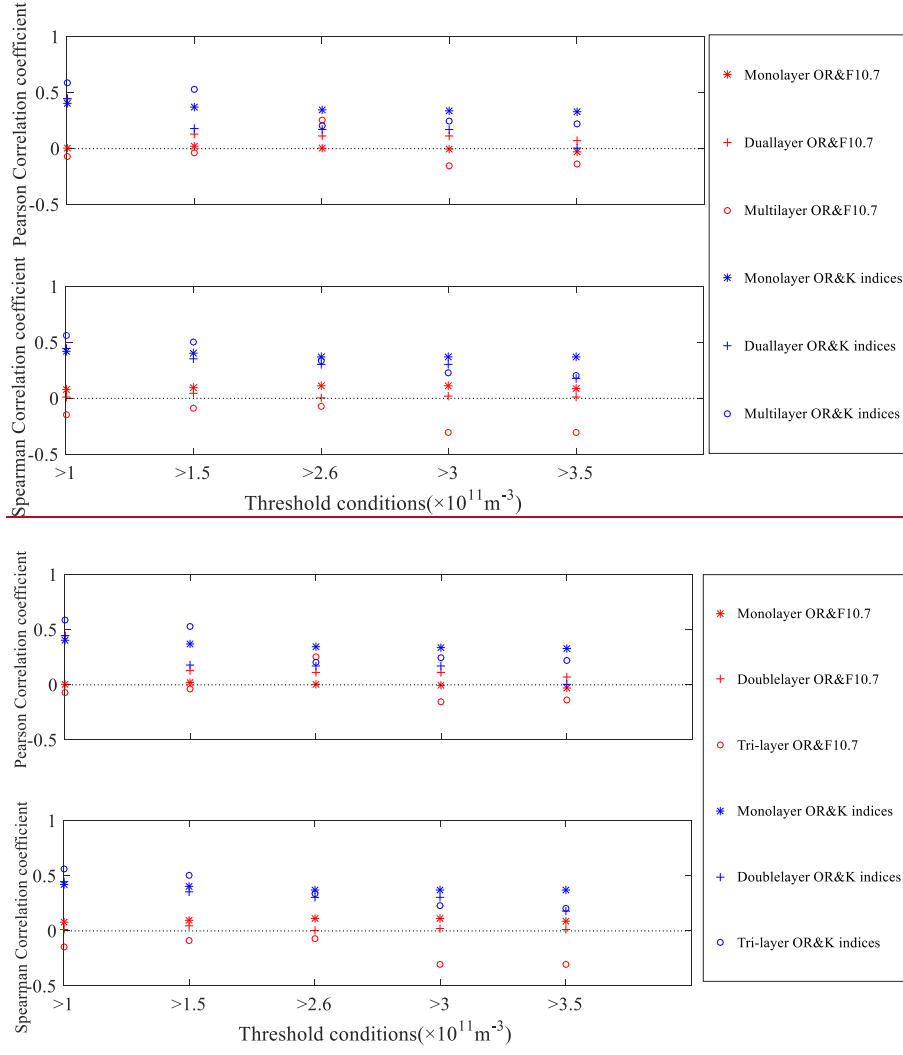

**Fig. 9** Pearson linear and Spearman rank correlation computed between layered PMSE OR (with threshold conditions of  $N_e \geq 1 \times 10^{11} \text{m}^{-3}$ ,  $N_e \geq 1.5 \times 10^{11} \text{m}^{-3}$ ,  $N_e \geq 2.6 \times 10^{11} \text{m}^{-3}$ ,  $N_e \geq 3 \times 10^{11} \text{m}^{-3}$  and  $N_e \geq 3.5 \times 10^{11} \text{m}^{-3}$ , respectively) and  $F_{10.7}$  corresponding to the occurrence of PMSE and between layered PMSE OR and K index corresponding to the occurrence of PMSE, respectively. For each correlation coefficient,  $P$  value is less than 0.05. The horizontal dotted line is drawn to separate positive and negative correlation coefficients.

Fig.8 shows that the variations of  $F_{10.7}$  and geomagnetic K index values corresponding to the occurrence of PMSE. The correlation of PMSE with solar and geomagnetic activities is not expected to affect by discontinuous PMSE. Since the  $F_{10.7}$  and K values corresponding to the occurrence of PMSE with threshold of  $N_e > 2.6 \times 10^{11} \text{m}^{-3}$ . The  $F_{10.7}$  and K values corresponding to the occurrence of PMSE with threshold conditions of  $N_e > 2.6 \times 10^{11} \text{m}^{-3}$ . So, the study of relations between PMSE and solar activities and between PMSE and geomagnetic activities make sense. Combined- The relation between layered PMSE OR and  $F_{10.7}$  and between layered PMSE OR and K values can be analyzed for the results shown in conjunction with Figures 5 through 8. with Fig. 5, 6, and 7, we can roughly analyze the relationship



~~between the layered PMSE OR and the F10.7 and between the layered PMSE OR and K values, but the results may be relatively inaccurate.~~ In order to ~~examine~~study the correlation between layered PMSE

OR and F<sub>10.7</sub> and between layered PMSE OR and K index, all the data points of PMSE OR, F<sub>10.7</sub> and K index with simultaneous occurrence were combined. Fig.9 shows the correlation coefficients computed

5 by combining all the points of PMSE OR (with thresholds-conditions of  $N_e \geq 1 \times 10^{11} \text{m}^{-3}$ ,  $N_e \geq 1.5 \times 10^{11} \text{m}^{-3}$ ,  $N_e \geq 2.6 \times 10^{11} \text{m}^{-3}$ ,  $N_e \geq 3 \times 10^{11} \text{m}^{-3}$  and  $N_e \geq 3.5 \times 10^{11} \text{m}^{-3}$ ), F<sub>10.7</sub> and K index with simultaneous occurrence and apply significant test. It ~~can be~~is seen from Fig.9 that layered PMSE OR is positively correlated with the K index and the coefficients indicate moderate correlation between the

variables., ~~but~~Whereas the correlation coefficient between PMSE mono- and F<sub>10.7</sub>, double-layer OR

10 and F<sub>10.7</sub> both are very low, indicating that their correlation is weak or even not relevant. Interestingly,

we found that the PMSE tri-layer OR has a negative correlation with F<sub>10.7</sub>, although the correlation was lower than what we have supposed., ~~this~~This finding ~~has~~never published in ~~previous~~any-existing

literature. Hence, it is indicated that the cases with positive values play a decisive role when calculating

the correlation coefficient between the data points of PMSE and K index occur simultaneously, and

15 events with negative values dominate in the calculation of the correlation coefficient between ~~PMSE~~ tri-layer PMSE OR and F<sub>10.7</sub>. But ~~PMSE~~ mono-, double- layer PMSE OR has hardly relevance with

F<sub>10.7</sub>.

The correlation between layered PMSE ~~layered~~OR and F<sub>10.7</sub> and between layered PMSE ~~layered~~OR and K index ~~were~~have been obtained. It indicates that there are many complicated factors for the formation

20 and development of PMSE besides the solar and geomagnetic activities. There are explanations for these

results: on one hand, the enhanced solar activity increases the electron density due to the increase of ionization, and with the increase of solar radiation, the photodissociation enhance and the water vapor

content is reduced. ~~On the other hand, the positive correlation between PMSE OR and K index may be apprehensible as because of the enhanced magnetic activity caused precipitating particles increase in the~~

25 ~~mesosphere, and lead to increase in electron densities.~~ Latteck and Bremer (2013) shows that PMSE are caused by inhomogeneities in the electron density of the radar Bragg scale within the plasma of the cold

summer mesopause region in the presence of negatively charged ice particles. Thus, the occurrence of PMSE contains information about mesospheric temperature and water vapor content but also depends on

the ionization due to solar electromagnetic radiation and precipitating high energetic particles. ~~But~~

However, ~~I still we still can't can not~~ explain why there is a negative correlation between tri-layer PMSE OR and  $F_{10.7}$ . ~~This should be focused in future or this may be our future research focus.~~

## 5-6 Summary and Conclusions

In the paper, ~~we presented the~~ PMSE occurrence ratios with monolayer, double- and ~~triple-~~layers ~~that were~~ detected by EISCAT VHF radar during a solar cycle have been presented. ~~It was obtained that the~~ The daily ~~variation~~ and seasonal variation of the layered PMSE was analysed. We implemented a ~~new~~ method to provide more accurate conclusions on the study of the long-term variation of PMSE with different thresholds. ~~Then the~~ The correlation relationship between layered PMSE and solar radiation flux ( $F_{10.7}$ ) and between layered PMSE and geomagnetic activity (K index) ~~were~~ was given. The following conclusions were reached:

- (1) Mono-, double- and tri-layer PMSE have different seasonal behavior. Monolayer PMSE events often begins in late May, reaches its maximum in early June or mid-June, keeps this level until the end of July or beginning of August, and gradually decreases or vanishes when it is close to the end of August or the beginning of September in general, which ~~was~~ is in agreement with earlier report ~~references~~ (Smirnova et al., 2011). The double-layer PMSE OR reaches maximum in mid-July ~~its maximum appears in mid-July~~ and simply fade away in early August. The ~~triple-~~layer PMSE appears later and disappears earlier in comparison to mono- ~~and~~ double-layer PMSE, and it is large in end of June and early July.
- (2) The variation trends of ~~PMSE~~ mono- double- and tri-layer PMSE OR under different electron density thresholds ~~conditions~~ are largely greatly consistent. It is found ~~was got~~ that the larger the threshold, the smaller the ratio. Beyond that, PMSE mono- and double-layer OR ~~were~~ are not associated with solar activity. and PMSE ~~triple-~~layer OR is inversely proportional to solar activity.
- (3) Layered PMSE ~~layered~~ OR is positively correlated with the K index. The correlation between PMSE mono- and double-layer OR and  $F_{10.7}$  is relatively weak, and PMSE tri-layer OR has a negative correlation with  $F_{10.7}$ .

### Data availability.

All EISCAT data used in this work have been downloaded at <https://www.eiscat.se/schedule/schedule.cgi>.

---

Competing interests. The authors declare that they have no conflict of interest.

### Authors' contributions

Shucan Ge designed this study, carried out statistics, analyzed the results and wrote the manuscript.

5 Hailong Li participated in the design of the study and the analysis of the results. Tong Xu and Mengyan Zhu helped with the conceptual ideas for the paper. Maoyan Wang and Lin Meng managed this study and participated in language grammar modification. Safi Ullah and Abdur Rauf participated in modifying language issues and provided a lot of suggestions about revised manuscript. All authors read and approved the final manuscript.

### 10 **Acknowledgments**

This study is supported by the National Natural Science Foundation of China [No. 41104097 and No.41304119]. This study is also supported by the National Key Laboratory of Electromagnetic Environment, China Research Institute of Radiowave Propagation (CRIRP). We also acknowledge EISCAT, which is an international association supported by China, Finland, Japan, Norway, Sweden, and  
15 the UK. I would like to thank Wen Yi who has contributed to this revised manuscript.

### **References**

Bartels, J., Heck, N. A. H., and Johnston, H. F.: The Three-Hour-Range Index Measuring Magnetic Activity, Journal of Geophysical Research, 44, 411-454, doi.org/10.1029/TE044i004p00411, 1939.

20 Baron, M.: EISCAT progress 1983–1985. Journal of Atmospheric and Terrestrial Physics, 48, 767–772, doi: 10.1016/0021-9169(86)90050-4, 1986.

Belova, E., P. Dalin, and Kirkwood, S.: Polar mesosphere summer echoes: A comparison of simultaneous observations at three wavelengths, Annales Geophysicae, 25, 2487–2496, doi: 10.5194/angeo-25-2487-2007, 2007

25 Blix, T. A., Rapp, M., and Lübken, F. J.: Relations between small scale electron number density fluctuations, radar backscatter, and charged aerosol particles, Journal of Geophysical Research Atmospheres, 108, 1-10, doi:org/10.1029/2002JD002430, 2003.

Boddy, R., and Smith, G.: Statistical Methods in Practice: for Scientists and Technologists, John Wiley & Sons Ltd Chichester, 2009.

30 Bremer, J., Hoffmann, P., Latteck, R., and Singer, W.: Seasonal and long-term variations of PMSE from VHF radar observations at Andenes, Norway, Journal of Geophysical Research Atmospheres, 108, doi:org/10.1029/2002JD002369, 2003.

- Bremer, J., Hoffmann, P., Höffner, J., Latteck, R., Singer, W., Zecha, M., and Zeller, O.: Long-term changes of mesospheric summer echoes at polar and middle latitudes, *Journal of Atmospheric and Solar-Terrestrial Physics*, 68, 1940-1951, doi:org/10.1016/j.jastp.2006.02.012, 2006.
- Cho, J. Y. N., Hall, T. M., and Kelley, M. C.: On the Role of Charged Aerosols in Polar Mesosphere Summer Echoes, *Journal of Geophysical Research Atmospheres*, 97, 875-886, doi:org/10.1029/91JD02836, 1992.
- Czechowsky, P., Ruester, R., and Schmidt, G.: Variations of mesospheric structures in different seasons, *Geophysical Research Letters*, 6, 459-462, doi:org/10.1029/GL006i006p00459, 1979.
- Devore, J. L.: *Probability and Statistics for Engineering and the Sciences (8th ed.)*. Boston, MA: Cengage Learning, 300-344. ISBN 978-0-538-73352-6, 2011.
- Hill, R. J., D. E. Gibson-Wilde, J. A. Werne and D. C. Fritts: *Turbulence-induced fluctuations in ionization and application to PMSE*, *Earth Planets Space*, 51, 499-513, doi: 10.1186/BF03353211, 1999.
- Hocking, W. K., and Röttger, J.: Studies of polar mesosphere summer echoes over EISCAT using calibrated signal strengths and statistical parameters, *Radio Science*, 32, 1425-1444, doi:org/10.1029/97RS00716, 1997.
- Hoffmann, P.: *On the occurrence and formation of multiple layers of polar mesosphere summer echoes*. *Geophysical Research Letters*, 32 (5), L05812, doi: 10.1029/2004gl021409, 2005.
- Inhester, B., Ulwick, J., Cho, J., Kelley, M. and Schmidt, G.: *Consistency of rocket and radar electron density observations: implications about the anisotropy of turbulence*, *Journal of Atmospheric and Solar-Terrestrial Physics*, 52, 855-873, doi: 10.1016/0021-9169(90)90021-e, 1990.
- Klostermeyer, J.: *A height- and time-dependent model of polar mesosphere summer echoes*. *Journal of Geophysical Research: Atmospheres*, 102(D6), doi: 10.1029/96JD03652, 1997.
- Latteck, R., Singer, W., Morris, R. J., Hocking, W. K., Murphy, D. J., Holdsworth, D. A. and Swarnalingam, N.: *Similarities and differences in polar mesosphere summer echoes observed in the Arctic and Antarctica*, *Annales Geophysicae*, 26, 2795-2806, doi: 10.5194/angeo-26-2795-2008, 2008.
- Latteck, R., and Bremer, J.: Long-term changes of polar mesosphere summer echoes at 69°N, *Journal of Geophysical Research Atmospheres*, 118, 10441-10448, doi:10.1002/jgrd.50787, 2013.
- Lehtinen, M.S., Huuskonen, A.: *General incoherent scatter analysis and GUIDAP*, *Journal of Atmospheric and Solar-Terrestrial Physics*, 58, 435-452, doi: 10.1016/0021-9169(95)00047-x, 1996.
- Li, Q., Rapp, M., Röttger, J., Latteck, R., et al.: *Microphysical parameters of mesospheric ice clouds derived from calibrated observations of polar mesosphere summer echoes at Bragg wavelengths of 2.8 m and 30 cm*, *Journal of Geophysical Research*, 115, D00I13, doi:10.1029/2009JD012271, 2010.
- Li, Q., and Rapp, M.: *PMSE-observations with the EISCAT VHF and UHF-radars: Statistical properties*, *Journal of Atmospheric and Solar-Terrestrial Physics*, 73, 944-956, doi:org/10.1016/j.jastp.2010.05.015, 2011.
- Palmer, J. R., Rishbeth, H., Jones, G. O. L., and Williams, P. J. S.: *A statistical study of polar mesosphere summer echoes observed by EISCAT*, *Journal of Atmospheric and Solar-Terrestrial Physics*, 58, 307-315, doi:org/10.1016/0021-9169(95)00038-0, 1996.
- ~~Rapp, M., and Lübken, F. J.: Polar mesosphere summer echoes (PMSE): review of observations and current understanding, *Atmospheric Chemistry and Physics*, 4, 2601-2633, doi:org/10.5194/acp-4-2601-2004, 2004.~~

Rapp, M. and Lübken, F.-J.: Polar mesosphere summer echoes (PMSE): Review of observations and current understanding. *Atmospheric Chemistry and Physics*, 4(11/12), 2601-2633, doi:10.5194/acp-4-2601-2004, 2004.

Rauf, A., Li, H., Ullah, S., Meng, L., Wang, B., and Wang, M.: Statistical study about the influence of particle precipitation on mesosphere summer echoes in polar latitudes during July 2013, *Earth Planets and Space*, 108(70), doi:org/10.1186/s40623-018-0885-6, 2018.

Reid, I. M., Czechowsky, P., Ruster, R., and Schmidt, G.: First VHF radar measurements of mesopause summer echoes at mid-latitudes, *Geophysical Research Letters*, 16, 135-138, doi:org/10.1029/GL016i002p00135, 1989.

Röttger, J.: Middle atmosphere and lower thermosphere processes at high latitudes studied with the EISCAT radars. *Journal of Atmospheric and Solar-Terrestrial Physics*, 56(9):1173-1195, doi: 10.1016/0021-9169(94)90056-6, 1994.

Smirnova, M., Belova, E., Kirkwood, S., and Mitchell, N.: Polar mesosphere summer echoes with ESRAD, Kiruna, Sweden: Variations and trends over 1997–2008, *Journal of Atmospheric and Solar-Terrestrial Physics*, 72, 435-447, doi:10.1016/j.jastp.2009.12.014, 2010.

Smirnova, M., Belova, E., and Kirkwood, S.: Polar mesosphere summer echo strength in relation to solar variability and geomagnetic activity during 1997–2009, *Annales Geophysicae*, 29, 563-572, doi:10.5194/angeo-29-563-2011, 2011.

Thomas, L., Astin, I., Prichard, I. T.: The characteristics of VHF echoes from the summer mesopause region at mid-latitudes. *Journal of Atmospheric and Terrestrial Physics*, 54(7-8), 969-977, doi: 10.1016/0021-9169(92)90063-q, 1992.

Thomas, G. E., and Olivero, J.: Noctilucent clouds as possible indicators of global change in the mesosphere, *Advances in Space Research*, 28, 937-946, 2001.

Varney, R. H., Kelley, M. C., Nicolls, M. J., Heinselman, C. J., and Collins, R. L.: The electron density dependence of polar mesospheric summer echoes, *Journal of Atmospheric and Solar-Terrestrial Physics*, 73, 2153-2165, doi:org/10.1016/j.jastp.2010.07.020, 2011.

Well, A. D., and Myers, J. L.: *Research design and statistical analysis*, New York, 1-736, 2003.

Wilks, D. S.: *Statistical Methods in the Atmospheric Sciences*, Burlington, MA: Academic Press, 1995.

~~Yi, W., Reid, I. M., Xue, X., Younger, J. P., Murphy, D. J., Chen, T., and Dou, X.: Response of neutral mesospheric density to geomagnetic forcing, *Geophysical Research Letters*, 44, 8647-8655, doi:org/10.1002/2017GL074813, 2017.~~

Zeller O. and Bremer J., The influence of geomagnetic activity on mesospheric summer echoes in middle and polar latitudes, *Annales Geophysicae*, 27(2): 831-8372, DOI: 10.5194/angeo-27-831-2009, 2009.
